# Supplementary material for: Performance of critical care prognostic scoring systems in low and middle-income countries: a systematic review
Source: Crit Care. 2018 Jan 26;22:18. doi: 10.1186/s13054-017-1930-8 (PMC5787236; doi:10.1186/s13054-017-1930-8)
Supplement: Supplementary file 2 — A table presenting the checklist for critical appraisal and data extraction for systematic reviews of prediction modelling studies. (XLSX 41 kb) [file 13054_2017_1930_MOESM2_ESM.xlsx]

## Sheet: Sheet1
Additional file 2 -Charms checklist
Study	Scoring system	Objective	Source of data	Participants 1. Participant eligibility and recruitment method (e.g., consecutive participants, location, number of centres, setting, inclusion and exclusion criteria) 2. Participant description 3. Details of treatments received, if relevant 4. Study dates	Outcomes to be predicted 1. Definition and method for measurement of outcome 2. Was the same outcome definition (and method for measurement) used in all patients? 3. Type of outcome (e.g., single or combined endpoints) 4. Was the outcome assessed without knowledge of the candidate predictors (i.e., blinded)? 5. Were candidate predictors part of the outcome (e.g., in panel or consensus diagnosis)?…	Candidate predictors 1. Number and type of predictors (e.g., demographics, patient history, physical examination, additional testing, disease characteristics) 2. Definition and method for measurement of candidate predictors 3. Timing of predictor measurement (e.g., at patient presentation, at diagnosis, at treatment initiation) 4. Were predictors assessed blinded for outcome, and for each other (…	Sample Size 1. Number of participants and number of outcomes/events 2. Number of outcomes/events in relation to the number of candidate predictors (Events Per Variable)	Missing data 1. Number of participants with any missing value (include predictors and outcomes) 2. Number of participants with missing data for each predictor 3. Handling of missing data (e.g., complete-case analysis, imputation, or other methods)	Model development	Model evaluation 1. Method used for testing model performance: development dataset only (random split of data, resampling methods e.g. bootstrap or cross-validation, none) or separate external validation (e.g. temporal, geographical, different setting, different investigators) 2. In case of poor validation, whether model was adjusted or updated (e.g., intercept recalibrated, predictor effects adj…	Model performance 1. Calibration (calibration plot, calibration slope, Hosmer-Lemeshow test) and 2. Discrimination (C-statistic, D-statistic, log-rank) measures with confidence intervals Classification measures (e.g., sensitivity, specificity, predictive values, net reclassification improvement) and whether a-priori cut points were used
Abhinandan and Vedavathi (2013)	APACHE II	Validation of model	Prospective	Patients with Sepsis and/MODS (>18 years) admitted to the ICU Exclusion - Patients receiving treatment with immunosuppressive agent, those with retroviral infection and those who are pregnant	Mortality (not specified - most likely ICU)	As original	50	Not reported	Not Reported	External validation Model not adjusted	Discrimination: not reported Calibration: not reported
Aggarwal et al (2006)	MPM II (24h)	Validation of model performance	Prospective cohort	Consecutive adult admissions (aged more than 15 years) to the RICU for man- agreement of respiratory failure 4 year period (specific dates not mentioned) 1 RICU, India	Hospital mortality	Predictors and timings as per original study	459	Not reported	Not Reported	External validation Model not adjusted?	Discrimination: AUC ROC curve. Calibration: Hosmer Lemeshow C and H Classification measures - Sensitivity, specificity, NPV, PPV, accuracy
Aggarwal et al (2006)	APACHE II	Validation of model performance	Prospective cohort	Consecutive adult admissions (aged more than 15 years) to the RICU for man- agreement of respiratory failure 4 year period (specific dates not mentioned) 1 RICU, India	Hospital mortality	Predictors and timings as per original study	459	Not reported	Not Reported	External validation Model not adjusted?	Discrimination: AUC ROC curve. Calibration: Hosmer Lemeshow C and H Classification measures - Sensitivity, specificity, NPV, PPV, accuracy
Aggarwal et al (2006)	SAPS II	Validation of model performance	Prospective cohort	Consecutive adult admissions (aged more than 15 years) to the RICU for man- agreement of respiratory failure 4 year period (specific dates not mentioned) 1 RICU, India	Hospital mortality	Predictors and timings as per original study	459	Not reported	Not Reported	External validation Model not adjusted?	Discrimination: AUC ROC curve. Calibration: Hosmer Lemeshow C and H Classification measures - Sensitivity, specificity, NPV, PPV, accuracy
Aggarwal et al (2006)	MPM II (initial)	Validation of model performance	Prospective cohort	Consecutive adult admissions (aged more than 15 years) to the RICU for man- agreement of respiratory failure 4 year period (specific dates NR) 1 RICU, India	Hospital mortality	Predictors and timings as per original study	459	Not reported	Not Reported	External validation Model not adjusted?	Discrimination: AUC ROC curve. Calibration: Hosmer Lemeshow C and H Classification measures - sensitivity, specificity, NPV, PPV, accuracy
Ahluwalia (1999)	APACHE II	Validation of performance and refining of model	Prospective cohort	Consecutive admissions(>13years) to 8 bedded medical ICU, India inclusion period NR.	Hospital mortality	Predictors as in original study. Score measured at 48 hours	79	Not reported	Not Reported	External validation Model not adjusted?	Discrimination: AUC ROC curve (CI not reported) Calibration not reported Classification: sensitivity, specificity
Celik et al (2014)	SAPS II	To determine the prognostic importance of admission time, admission day, admission source, and route of admission, attached devices before admission, diagnosis of patients, and total Simplified Acute Physiology Score (SAPS) II score during admission on intensive care unit mortality rates.	Retrospective descriptive cohort	Patients (>18 years) admitted to adult internal medicine, surgery, and anaesthesia ICUs of a University hospital, Turkey Exclusions - missing data, ICU readmission, <4hours ICU stay January 2006 to January 2011	ICU mortality	Predictors and timings as per original study	545	Exclusion -One hundred and seventy-eight patients (21.1%) were excluded due to lack of data, and 46 (5.55%) patients were excluded due to archival documentation problems. No information on admission source, attached devices, PaO2/FiO2, and Glasgow Coma Score was available for the excluded group in the computerised medical records. The included group survey did not differ from the excluded group r…	Not Reported	External validation Model not adjusted?	Discrimination: not reported Calibration: not reported
Chang et la 2006	APACHE II	Validation of model	Prospective	Consecutive patients(>12 years) admitted to medical-surgical ICU Exclusion- Patients who did not have a malignant neoplasm January 1996 to December 2000	Hospital mortality	As original. The worst acute physiology scores recorded during the initial 24 hours of the ICU stay were used	1263	Not reported	Not Reported	External validation Model not adjusted	Discrimination: AUC ROC curve. Calibration: Hosmer Lemeshow
Chiavone and Rasslan (2005)	APACHE II	to verify whether the elapsed time before transfer from the operating theatre to the intensive care unit interferes in the predictive accuracy of the APACHE II index, length of stay in the intensive care unit and hospital, and hospital mortality, among patients who have undergone emergency surgery.	Prospective cohort	Patients admitted to the intensive care unit directly from the surgical unit, following emergency surgery Exclusions -missing data, ICU readmission in same hospital stay, not from hospitals emergency service. 1 15-bed medical and surgical ICU, Brazil August 2002 and July 2003	Hospital mortality	Predictors and timings as per original study	94 2 groups Up to -12hours wait for admission Over -12 hour wait for admission	Exclusion -One patient excluded (original number of patients 104 (9 excluded for other reasons, 94 included)	Not Reported	External validation Model not adjusted?	Discrimination: AUC ROC curve Calibration - "The calibration curve, stratified in 10% risk bands, obtained an r2 value of 0.46 (Figure 4)."
Eapen et al (1997)	APACHE II (VM)	Validation of model performance after modification	Prospective cohort	Patients admitted to medical ICU 11-bed medical ICU of a University hospital, India Exclusion - trauma patients December 1991 to March 1993	Not specified	GCS excluded from predictors of original study Score measured within 24 hours.	500	Not reported	Not Reported	External validation Model not adjusted?	Discrimination: AUC ROC curve (CI not reported) Calibration not reported Classification: Not reported
Evran et a; (2016)	APACHE II	Validation of model	Retrospective	Patients (>18 years of age) admitted to the medical-surgical ICU, Exclusion- ICU Stay <24 h, patients with a history of coronary artery surgery, a major burn, recipients of organ transplants patients referred from other ICUs Only the first data set of patients with a history of multiple admissions in ICU was included in data analysis July 2010 and July 2011	ICU mortality	Predictors and timings not specified (assumed to be as per original study)	487	Not reported	Not Reported	External validation Model not adjusted	Discrimination: AUC ROC curve (Table). Calibration: Not reported Classification measures - sensitivity, specificity, accuracy, PPV and NPV
Evran et a; (2016)	APACHE IV	Validation of model	Retrospective	Patients (>18 years of age) admitted to the medical-surgical ICU, Exclusion- ICU Stay <24 h, patients with a history of coronary artery surgery, a major burn, recipients of organ transplants patients referred from other ICUs Only the first data set of patients with a history of multiple admissions in ICU was included in data analysis July 2010 and July 2011	ICU mortality	Predictors and timings not specified (assumed to be as per original study)	487	Not reported	Not Reported	External validation Model not adjusted	Discrimination: AUC ROC curve (Table). Calibration: Not reported Classification measures - sensitivity, specificity, accuracy, PPV and NPV
Evran et a; (2016)	SAPS 3	Validation of model	Retrospective	Patients (>18 years of age) admitted to the medical-surgical ICU, Exclusion- ICU Stay <24 h, patients with a history of coronary artery surgery, a major burn, recipients of organ transplants patients referred from other ICUs Only the first data set of patients with a history of multiple admissions in ICU was included in data analysis July 2010 and July 2011	ICU mortality	Predictors and timings not specified (assumed to be as per original study)	487	Not reported	Not Reported	External validation Model not adjusted	Discrimination: AUC ROC curve (Table). Calibration: Not reported Classification measures - sensitivity, specificity, accuracy, PPV and NPV
Fadaizadeh et al (2012)	APACHE II	Validation of model performance	Retrospective cohort	All records of patients admitted during a 1-year period 1 respiratory ICU, Iran (specific dates NR)	ICU mortality	Predictors and timings as per original study	415	Not reported	Not Reported	External validation Model not adjusted?	Discrimination: AUC ROC curve. Calibration: Hosmer Lemeshow C statistic Classification measures - sensitivity, specificity
Fadaizadeh et al (2012)	SAPS II	Validation of model performance	Retrospective cohort	All records of patients admitted during a 1-year period 1 respiratory ICU, Iran (specific dates NR)	ICU mortality	Predictors and timings as per original study	415	Not reported	Not Reported	External validation Model not adjusted?	Discrimination: AUC ROC curve. Calibration: Hosmer Lemeshow C statistic Classification measures - sensitivity, specificity
Faruq et al (2013)	APACHE II	Validation of model performance	Prospective, descriptive cohort	All individuals over 16 years old that had been admitted to the ICU multidisciplinary ICU in 2 hospitals in Bangladesh Exclusion -coronary care, cardiac surgery or other patients admitted for planned post-operative observations for less than 24 hours, ICU readmission January to December 2008 October to December 2008.	ICU mortality	Predictors and timings as per original study	194	Normal values substituted - GCS attributed as normal (numbers not reported).	Not Reported	External validation Model not adjusted?	Discrimination: AUC ROC curve. Calibration: Hosmer Lemeshow C statistic
Faruq et al (2013)	SAPS II	Validation of model performance	Prospective, descriptive cohort	All individuals over 16 years old that had been admitted to the ICU multidisciplinary ICU in 2 hospitals in Bangladesh Exclusion -coronary care, cardiac surgery or other patients admitted for planned post-operative observations for less than 24 hours, ICU readmission January to December 2008 October to December 2008.	ICU mortality	Predictors and timings as per original study	194	Normal values substituted - GCS attributed as normal (numbers not reported).	Not Reported	External validation Model not adjusted?	Discrimination: AUC ROC curve. Calibration: Hosmer Lemeshow C statistic
Galal et al (2013)	SAPS II	Validation of model performance	Prospective, observational cohort	All consecutive patients admitted to the RICU of Chest Hospital, Egypt inclusion period NR.	ICU mortality	Predictors and timings as per original study	105	Not reported	Not Reported	External validation Model not adjusted?	Discrimination: AUC ROC curve.(CI not reported) Calibration: Hosmer Lemeshow Classification measures - Sensitivity, specificity, accuracy
Galal et al (2013)	APACHE II	Validation of model performance	Prospective, observational cohort	All consecutive patients admitted to the RICU of Chest Hospital, Egypt inclusion period NR.	ICU mortality	Predictors and timings as per original study	105	Not reported	Not Reported	External validation Model not adjusted?	Discrimination: AUC ROC curve.(CI not reported) Calibration: Hosmer Lemeshow Classification measures - Sensitivity, specificity, accuracy
Gilani et al (2014)	APACHE III	Validation of model performance	Prospective cohort	Consecutive patients admitted to the surgical ICU of university hospital, Iran April 2010 through September 2010 Exclusion -<24h stay	Hospital mortality	Predictors and timings as per original study	202	Not reported	Not Reported	External validation Model not adjusted?	Discrimination: AUC ROC curve.(CI not reported) Calibration: Hosmer Lemeshow Classification measures - Sensitivity, specificity, NPV, PPV,
Gilani et al (2014)	SAPS II	Validation of model performance	Prospective cohort	Consecutive patients admitted to the surgical ICU of university hospital, Iran April 2010 through September 2010 Exclusion -<24h stay	Hospital mortality	Predictors and timings as per original study	202	Not reported	Not Reported	External validation Model not adjusted?	Discrimination: AUC ROC curve.(CI not reported) Calibration: Hosmer Lemeshow Classification measures - Sensitivity, specificity, NPV, PPV
Gilani et al (2014)	APACHE II	Validation of model performance	Prospective cohort	Consecutive patients admitted to the surgical ICU of university hospital, Iran April 2010 through September 2010 Exclusion -<24h stay	Hospital mortality	Predictors and timings as per original study	202	Not reported	Not Reported	External validation Model not adjusted?	Discrimination: AUC ROC curve.(CI not reported) Calibration: Hosmer Lemeshow Classification measures - Sensitivity, specificity, NPV, PPV
Godinjak et al (2017)	APACHE II	Validation of model	Prospective	Patients admitted to MICU from ED and wards. October 2014 to September 2015	Hospital mortality	AS original. Worst parameters for SAPS II and APACHE II were calculated 24 hours after admission to the MICU	174/189	Exclusion - 15 patients who had died in the first 24 hours of hospitalization in the MICU, for which SAPS II and APACHE II scores could not be calculated	Not Reported	External validation Model not adjusted	Discrimination: AUC ROC curve. Calibration: Not reported Classification measures - sensitivity, specificity
Godinjak et al (2017)	SAPS II	Validation of model	Prospective	Patients admitted to MICU from ED and wards. October 2014 to September 2016	Hospital mortality	AS original. Worst parameters for SAPS II and APACHE II were calculated 24 hours after admission to the MICU	174/190	Exclusion - 15 patients who had died in the first 24 hours of hospitalization in the MICU, for which SAPS II and APACHE II scores could not be calculated	Not Reported	External validation Model not adjusted	Discrimination: AUC ROC curve. Calibration: Not reported Classification measures - sensitivity, specificity
Gupta and Arora (2003)	APACHE II	Validation of model performance	Prospective cohort	Consecutive patients with lung ailments, from the Institute's chest clinic and chest ward or from an outside hospital. RICU, tertiary chest institute, India September 2001 to February 2003	ICU mortality	Predictors and timings as per original study	330 Patients categorised as surgical or medical(respiratory or non respiratory)	Not reported	Not Reported	External validation Model not adjusted?	Discrimination: AUC ROC curve.(CI not reported) Calibration: Hosmer Lemeshow Classification measures -accuracy
Haidri et al (2005)	APACHE II	Validation of model performance	Prospective cohort	Consecutive patients of any age and either gender for any cause admitted in respiratory ICU, university hospital, Pakistan Exclusion- ICU readmission, missing data January 2009 to December 2009	Not specified	Predictors and timings as per original study	142	Exclusion - All patients with incomplete records and missing variables including laboratory investigations or who were not followed up due to any reason were excluded (numbers not reported).	Not Reported	External validation Model not adjusted?	Discrimination: not reported Calibration: not reported
Halim et al (2009)	APACHE II	Validation of model performance	Prospective, observational cohort	Consecutive surgical patients (>14 years) admitted to medical-surgical ICU, university hospital, Indonesia Exclusion - burn injuries, discharge against medical advice, withdrawn from treatment, resigned from the study, death or discharge in <24 hours ICU stay January 2008 to December 2008	ICU mortality	Predictors and timings as per original study	144	Not reported	Not Reported	External validation Model not adjusted?	Discrimination: AUC ROC curve.(CI not reported) Calibration: Hosmer Lemeshow Classification measures - Sensitivity, specificity, NPV, PPV, accuracy
Hamza et al (2009)	APACHE IV	Validation of model performance	Prospective, observational cohort	Consecutive critically ill patients (>18 years) from medical, Obs. & Gyn. and surgical department to mixed medical, surgical and coronary care unit, university hospital, Egypt Exclusion - suffered burn injuries, had coronary artery bypass grafting surgery (CBAG), organ transplant- station, died within four hours of admission to ICU or if patients, readmission to ICU February 2008 to March 2009	ICU mortality	Predictors and timings as per original study	264	Not reported	Not Reported	External validation Model not adjusted?	Discrimination: AUC ROC curve. Calibration: Hosmer Lemeshow H statistic
Hamza et al (2009)	MPM II (initial)	Validation of model performance	Prospective, observational cohort	Consecutive critically ill patients (>18 years) from medical, Obs. & Gyn. and surgical department to mixed medical, surgical and coronary care unit, university hospital, Egypt Exclusion - suffered burn injuries, had coronary artery bypass grafting surgery (CBAG), organ transplant- station, died within four hours of admission to ICU or if patients, readmission to ICU February 2008 to March 2009	ICU mortality		264	Not reported	Not Reported	External validation Model not adjusted?	Discrimination: AUC ROC curve. Calibration: Hosmer Lemeshow H statistic
Hamza et al (2009)	SAPS II	Validation of model performance	Prospective, observational cohort	Consecutive critically ill patients (>18 years) from medical, Obs. & Gyn. and surgical department to mixed medical, surgical and coronary care unit, university hospital, Egypt Exclusion - suffered burn injuries, had coronary artery bypass grafting surgery (CBAG), organ transplant- station, died within four hours of admission to ICU or if patients, readmission to ICU February 2008 to March 2009	ICU mortality		264	Not reported	Not Reported	External validation Model not adjusted?	Discrimination: AUC ROC curve. Calibration: Hosmer Lemeshow H statistic
Hashmi et al (2016)	APACHE II (manual calculation)	Validation of model	Retrospective	All patients admitted to the surgical ICU January 2011 to December 2012	Mortality (not specified - most likely ICU)	Physiological variables and laboratory results of first 24 h after admission to SICU	213	Not reported	Not Reported	External validation Model not adjusted	Discrimination: AUC ROC curve. Calibration: Hosmer Lemeshow Classification measures - sensitivity, specificity, accuracy SMR
Hashmi et al (2016)	APACHE II (automatic calculation using software TMT)	Validation of model	Retrospective	All patients admitted to the surgical ICU January 2011 to December 2013	Mortality (not specified - most likely ICU)	Physiological variables and laboratory results of first 24 h after admission to SICU	213	Not reported	Not Reported	External validation Model not adjusted	Discrimination: AUC ROC curve. Calibration: Hosmer Lemeshow Classification measures - sensitivity, specificity, accuracy SMR
Hernandez and Palo (2014)	SAPS 3	Validation of model performance	Retrospective cohort	Records of all adult patients 19 years of age and above, regardless of diagnosis, including patients admitted for post-operative monitoring, burns, and trauma, were included 18-bed mixed medical and surgical unit, private tertiary medical centre, Philippines January 2011 to 31 August 2013	ICU mortality	Predictors and timings as per original study	2426	Exclusion - 159 (6.6%) were excluded for incomplete SAPS 3 data	Not Reported	External validation Model not adjusted?	Discrimination: AUC ROC curve.(CI not reported) Calibration: Hosmer Lemeshow C statistic
Hosseini and Ramazani (2015)	APACHE II	Validation of model performance	Prospective, observational cohort	Consecutive patients who had undergone procedures that require anaesthesia Post-Anaesthesia Care Unit, Iran Exclusion- ICU stay <24hours July 2011 to February 2012	ICU mortality	Predictors and timings as per original study	150	Not reported	Not Reported	External validation Model not adjusted?	Discrimination: AUC ROC curve. Calibration: Hosmer Lemeshow Classification measures - sensitivity, specificity, accuracy
Juneja et al (2012)	APACHE II	Validation of model	Retrospective	Patients (>18 years) admitted to the ICU Exclusion - Patients with LOS <12 hours and those admitted from other ICUs. Data only from first ICU admission during hospital stay. July 2008 to September 2009	ICU mortality	As original	653	Not reported	Not Reported	External validation Model not adjusted	Discrimination: AUC ROC curve. Calibration: Hosmer Lemeshow Classification measures - sensitivity, specificity SMR
Juneja et al (2012)	APACHE III	Validation of model	Retrospective	Patients (>18 years) admitted to the ICU Exclusion - Patients with LOS <12 hours and those admitted from other ICUs. Data only from first ICU admission during hospital stay. July 2008 to September 2010	ICU mortality	As original	653	Not reported	Not Reported	External validation Model not adjusted	Discrimination: AUC ROC curve. Calibration: Hosmer Lemeshow Classification measures - sensitivity, specificity SMR
Juneja et al (2012)	APACHE IV	Validation of model	Retrospective	Patients (>18 years) admitted to the ICU Exclusion - Patients with LOS <12 hours and those admitted from other ICUs. Data only from first ICU admission during hospital stay. July 2008 to September 2011	ICU mortality	As original	653	Not reported	Not Reported	External validation Model not adjusted	Discrimination: AUC ROC curve. Calibration: Hosmer Lemeshow Classification measures - sensitivity, specificity SMR
Juneja et al (2012)	SAPS II	Validation of model	Retrospective	Patients (>18 years) admitted to the ICU Exclusion - Patients with LOS <12 hours and those admitted from other ICUs. Data only from first ICU admission during hospital stay. July 2008 to September 2012	ICU mortality	As original	653	Not reported	Not Reported	External validation Model not adjusted	Discrimination: AUC ROC curve. Calibration: Hosmer Lemeshow Classification measures - sensitivity, specificity SMR
Juneja et al (2012)	SAPS 3	Validation of model	Retrospective	Patients (>18 years) admitted to the ICU Exclusion - Patients with LOS <12 hours and those admitted from other ICUs. Data only from first ICU admission during hospital stay. July 2008 to September 2013	ICU mortality	As original	653	Not reported	Not Reported	External validation Model not adjusted	Discrimination: AUC ROC curve. Calibration: Hosmer Lemeshow Classification measures - sensitivity, specificity SMR
Juneja et al (2012)	MPM II (initial)	Validation of model	Retrospective	Patients (>18 years) admitted to the ICU Exclusion - Patients with LOS <12 hours and those admitted from other ICUs. Data only from first ICU admission during hospital stay. July 2008 to September 2014	ICU mortality	As original	653	Not reported	Not Reported	External validation Model not adjusted	Discrimination: AUC ROC curve. Calibration: Hosmer Lemeshow Classification measures - sensitivity, specificity SMR
Juneja et al (2012)	MPM III (initial)	Validation of model	Retrospective	Patients (>18 years) admitted to the ICU Exclusion - Patients with LOS <12 hours and those admitted from other ICUs. Data only from first ICU admission during hospital stay. July 2008 to September 2015	ICU mortality	As original	653	Not reported	Not Reported	External validation Model not adjusted	Discrimination: AUC ROC curve. Calibration: Hosmer Lemeshow Classification measures - sensitivity, specificity SMR
Khan et al (2015)	SAPS II	Validation of model performance	Prospective, observational cohort	Consecutive patients (>18yrs) admitted to ICU 5- bed medical surgical ICU, tertiary care teaching hospital, India Exclusion -ICU stay < 48 h, acute coronary syndrome, burn, terminal cancer, do not resuscitate (DNR), and end-of-life care orders November 2009 and March 2011	28 day mortality	Predictors as in original study. Score measured at 24 hours	85	Not reported	Not Reported	External validation Model not adjusted?	Discrimination: AUC ROC curve. Calibration: Not reported Classification measures - sensitivity, specificity,
Khan et al (2015)	APACHE II	Validation of model performance	Prospective, observational cohort	Consecutive patients (>18yrs) admitted to ICU 5- bed medical surgical ICU, tertiary care teaching hospital, India Exclusion -ICU stay < 48 h, acute coronary syndrome, burn, terminal cancer, do not resuscitate (DNR), and end-of-life care orders November 2009 and March 2011	28 day mortality	Predictors as in original study. Score measured at 24 hours	85	Not reported	Not Reported	External validation Model not adjusted?	Discrimination: AUC ROC curve. Calibration: Not reported Classification measures - sensitivity, specificity,
Khan et al (2015)	SAPS II (TM 48 hours)	Validation of model performance after modification	Prospective, observational cohort	Consecutive patients (>18yrs) admitted to ICU 5- bed medical surgical ICU, tertiary care teaching hospital, India Exclusion -ICU stay < 48 h, acute coronary syndrome, burn, terminal cancer, do not resuscitate (DNR), and end-of-life care orders November 2009 and March 2011	28 day mortality	Predictors as in original study. Score measured at 48 hours	85	Not reported	Not Reported	External validation Model not adjusted?	Discrimination: AUC ROC curve. Calibration: Not reported Classification measures - sensitivity, specificity,
Khan et al (2015)	APACHE II (TM 48 hours)	Validation of model performance after modification	Prospective, observational cohort	Consecutive patients (>18yrs) admitted to ICU 5- bed medical surgical ICU, tertiary care teaching hospital, India Exclusion -ICU stay < 48 h, acute coronary syndrome, burn, terminal cancer, do not resuscitate (DNR), and end-of-life care orders November 2009 and March 2011	28 day mortality	Predictors as in original study. Score measured at 48 hours	85	Not reported	Not Reported	External validation Model not adjusted?	Discrimination: AUC ROC curve. Calibration: Not reported Classification measures - sensitivity, specificity,
Khawannimit and Geater (2007)	SAPS II	Validation of model performance	Prospective, observational cohort	Consecutive patients admitted to a ten-bed surgical ICU and a nine-bed mixed medical and coronary care unit tertiary referral university teaching hospital, Thailand Exclusion- suffered burn injuries, had not received attempted cardiac resuscitation, were withdrawn from treatment, died within four hours of admission to ICU, ICU stay < 24 hours, readmission to ICU. July 1, 2004 until October 31, 20…	Hospital mortality	Predictors and timings as per original study	1316	Normal values attributed - GCS attributed as normal 6.3% for SAPS II variables, except bilirubin which was missing in 76.5% of the presented data records	Not Reported	External validation Model not adjusted?	Discrimination: AUC ROC curve. Calibration: Hosmer Lemeshow C and H Classification measures - Sensitivity, specificity, NPV, PPV, accuracy
Khawannimit and Geater (2007)	APACHE II	Validation of model performance	Prospective, observational cohort	Consecutive patients admitted to a ten-bed surgical ICU and a nine-bed mixed medical and coronary care unit tertiary referral university teaching hospital, Thailand Exclusion- suffered burn injuries, had not received attempted cardiac resuscitation, were withdrawn from treatment, died within four hours of admission to ICU, ICU stay < 24 hours, readmission to ICU . July 1, 2004 until October 31, 2…	Hospital mortality	Predictors and timings as per original study	1316	Normal values attributed - GCS attributed as normal Missing physiological variables were found in 6% for APACHE II, except bilirubin, which was missing in 76.5% of the presented data records.	Not Reported	External validation Model not adjusted?	Discrimination: AUC ROC curve. Calibration: Hosmer Lemeshow C and H Classification measures - Sensitivity, specificity, NPV, PPV, accuracy
Khwannimit and Bhurayanontachai (2011)	SAPS 3 (AUS)	Validation of model performance	Prospective cohort	Consecutive patients (>18yrs) admitted 10-bed mixed medical-coronary care unit , tertiary referral university teaching hospital, Thailand. Exclusion - ICU stay < 8 hours, readmission to ICU	Hospital mortality	Predictors and timings as per original study	2022 Random split into model calibration and validation groups for testing customised equation	Not reported	Not Reported	Random split of data into calibration and validation groups First level customisation	Discrimination: AUC ROC curve. Calibration: Hosmer Lemeshow H and C statistic
Khwannimit and Bhurayanontachai (2011)	Customised SAPS 3 (AUS)	Validation of model performance	Prospective cohort		Hospital mortality	Predictors and timings as per original study	2022 Random split into model calibration and validation groups for testing customised equation	Not reported	Not Reported	Random split of data into calibration and validation groups First level customisation	Discrimination: AUC ROC curve. Calibration: Hosmer Lemeshow H and C statistic
Khwannimit and Bhurayanontachai (2011)	SAPS II	Validation of model performance	Prospective cohort	Consecutive patients (>18yrs) admitted 10-bed mixed medical-coronary care unit , tertiary referral university teaching hospital, Thailand. Exclusion - ICU stay < 8 hours, readmission to ICU	Hospital mortality	Predictors and timings as per original study	2022 Random split into model calibration and validation groups for testing customised equation	Not reported	Not Reported	Random split of data into calibration and validation groups First level customisation	Discrimination: AUC ROC curve. Calibration: Hosmer Lemeshow H and C statistic
Khwannimit and Bhurayanontachai (2011)	Customised SAPS II	Validation of model performance	Prospective cohort	Consecutive patients (>18yrs) admitted 10-bed mixed medical-coronary care unit , tertiary referral university teaching hospital, Thailand. Exclusion - ICU stay < 8 hours, readmission to ICU	Hospital mortality	Predictors and timings as per original study	2022 Random split into model calibration and validation groups for testing customised equation	Not reported	Not Reported	Random split of data into calibration and validation groups First level customisation	Discrimination: AUC ROC curve. Calibration: Hosmer Lemeshow H and C statistic
Khwannimit and Bhurayanontachai (2011)	SAPS 3	Validation of model performance	Prospective cohort	Consecutive patients (>18yrs) admitted 10-bed mixed medical-coronary care unit , tertiary referral university teaching hospital, Thailand. Exclusion - ICU stay < 8 hours, readmission to ICU	Hospital mortality	Predictors and timings as per original study	2022 Random split into model calibration and validation groups for testing customised equation	Not reported	Not Reported	Random split of data into calibration and validation groups First level customisation	Discrimination: AUC ROC curve. Calibration: Hosmer Lemeshow H and C statistic
Khwannimit and Bhurayanontachai (2011)	APACHE II	Validation of model performance	Prospective cohort	Consecutive patients (>18yrs) admitted 10-bed mixed medical-coronary care unit , tertiary referral university teaching hospital, Thailand. Exclusion - ICU stay < 8 hours, readmission to ICU	Hospital mortality	Predictors and timings as per original study	2022 Random split into model calibration and validation groups for testing customised equation	Not reported	Not Reported	Random split of data into calibration and validation groups First level customisation	Discrimination: AUC ROC curve. Calibration: Hosmer Lemeshow H and C statistic
Khwannimit and Bhurayanontachai (2011)	Customised APACHE II	Validation of model performance	Prospective cohort	Consecutive patients (>18yrs) admitted 10-bed mixed medical-coronary care unit , tertiary referral university teaching hospital, Thailand. Exclusion - ICU stay < 8 hours, readmission to ICU	Hospital mortality	Predictors and timings as per original study	2022 Random split into model calibration and validation groups for testing customised equation	Not reported	Not Reported	Random split of data into calibration and validation groups First level customisation	Discrimination: AUC ROC curve. Calibration: Hosmer Lemeshow H and C statistic
Kiatboonsri and Charoenpan (1995)	APACHE II	Validation of model performance	Prospective cohort	Consecutive patients (>15 years) admitted to 8-10 bed mixed medical- coronary intensive care unit, university hospital, Thailand Exclusion - death shortly after admission before investigations could be carried out June 1989 to June 1990	Hospital mortality	Predictors and timings as per original study	334	Not reported	Not Reported	External validation Model not adjusted?	Discrimination: AUROC not reported Calibration: not reported Classification measures - Sensitivity, specificity, PPV, accuracy
Liu et al (2016)	APACHE II	Validation of model	Prospective	Patients (>18 years of age) admitted to the ICU with sepsis due to one of the following infections: community acquired pneumonia, hospital acquired pneumonia, ventilator-associated pneumonia, acute pyelonephritis, intra-abdominal infection- , or primary bacteraemia; and blood sampling within 24 h from the presentation of signs of sepsis Exclusion- advanced cancer or terminal patients with other p…	28 day mortality	As original (not specified)	137	Not reported	Not Reported	External validation Model not adjusted	Discrimination: AUC ROC curve (Table). Calibration: Not reported Classification measures - sensitivity, specificity,
Mohan et al (2015)	APACHE II	Validation of model	Prospective	All the patients admitted in ICU either with existing sepsis or those who developed new episode of sepsis/severe sepsis/septic shock within the ICU were enrolled. Exclusion - patients who died within 24 h of admission and those with SIRS without any definite focus of infection. June 2010 and June 2012	ICU mortality	As original calculated on day 1 of admission	100	Not reported	Not Reported	External validation Model not adjusted	Discrimination: AUC ROC curve. Calibration: Hosmer Lemeshow Classification measures - sensitivity, specificity
Mohan et al (2015)	SAPS II	Validation of model	Prospective	All the patients admitted in ICU either with existing sepsis or those who developed new episode of sepsis/severe sepsis/septic shock within the ICU were enrolled. Exclusion - patients who died within 24 h of admission and those with SIRS without any definite focus of infection. June 2010 and June 2012	ICU mortality	As original calculated on day 1 of admission	100	Not reported	Not Reported	External validation Model not adjusted	Discrimination: AUC ROC curve. Calibration: Hosmer Lemeshow Classification measures - sensitivity, specificity
Mohan et al (2015)	SAPS 3	Validation of model	Prospective	All the patients admitted in ICU either with existing sepsis or those who developed new episode of sepsis/severe sepsis/septic shock within the ICU were enrolled. Exclusion - patients who died within 24 h of admission and those with SIRS without any definite focus of infection. June 2010 and June 2012	ICU mortality	As original calculated on day 1 of admission	100	Not reported	Not Reported	External validation Model not adjusted	Discrimination: AUC ROC curve. Calibration: Hosmer Lemeshow Classification measures - sensitivity, specificity
Nair et al (2016)	SAPS I	Validation of model	Prospective cohort	Consecutive patients (>18 years of age) admitted to the medical ICU diagnosed with infectious disease. Exclusion -Patients with history of chronic illness (renal/hepatic/pulmonary/cardiac), history of diabetes, hypertension, chronic obstructive pulmonary disease, and heart disease, those who were on immunosuppressive therapy/chemoradiotherapy for malignancy and those patients in immunocompromised…	ICU mortality	Predictors as in original (assumed as not specified) worst values of first 24h	48	Not reported	Not Reported	External validation Model not adjusted	Discrimination: AUC ROC curve (Table). Calibration: Not reported
Naqvi et al (2016)	APACHE II	Validation of model	Retrospective	Patients (>16 years of age) admitted to the medical-surgical ICU and High dependency unit, Exclusion - coronary care patients, patients admitted for observation and patients with readmission April 2012 to August 2012	ICU mortality/ Hospital mortality	As original studies Worst values at admission followed by 24h, 48h and 72 h	96 out of 123	Exclusion- due to incomplete information of scoring system in case records	Not Reported	External validation Model not adjusted	Discrimination: AUC ROC curve. Calibration: Hosmer Lemeshow
Naqvi et al (2016)	SAPS II	Validation of model	Retrospective	Patients (>16 years of age) admitted to the medical-surgical ICU and High dependency unit, Exclusion - coronary care patients, patients admitted for observation and patients with readmission April 2012 to August 2014	ICU mortality/ Hospital mortality	As original studies Worst values at admission followed by 24h, 48h and 72 h	96 out of 123	Exclusion- due to incomplete information of scoring system in case records	Not Reported	External validation Model not adjusted	Discrimination: AUC ROC curve. Calibration: Hosmer Lemeshow
Nassar Jr, et al (2012)	APACHE IV	Validation of model performance	Prospective cohort	All consecutively patients (>18 years) admitted to 3 medical surgical ICUs, Brazil. Exclusion- acute coronary syndrome, readmission to ICU, transfer to another hospital. July 2008 to December 2009	Hospital mortality	Predictors and timings as per original study	5780	Exclusion and normal attribution- 3.02% patients with incomplete data which prevented an adequate calculation of one or more of the scores were excluded; these missing data could be pre-ICU length of stay, reason for ICU admission, chronic health variables and mechanical ventilation on first day. Missing physiologic variables, namely bilirubin, acid-base abnormalities, PaO2 or PaO2/FiO2 ratio, we…	Not Reported	External validation Model not adjusted?	Discrimination: AUC ROC curve. Calibration: Hosmer Lemeshow C statistic
Nassar Jr, et al (2012)	MPM III (initial)	Validation of model performance	Prospective cohort	All consecutively patients (>18 years) admitted to 3 medical surgical ICUs, Brazil. Exclusion- acute coronary syndrome, readmission to ICU, transfer to another hospital. July 2008 to December 2010	Hospital mortality	Predictors and timings as per original study	5780	Exclusion and normal attribution- 3.02% patients with incomplete data which prevented an adequate calculation of one or more of the scores were excluded; these missing data could be pre-ICU length of stay, reason for ICU admission, chronic health variables and mechanical ventilation on first day. Missing physiologic variables, namely bilirubin, acid-base abnormalities, PaO2 or PaO2/FiO2 ratio, we…	Not Reported	External validation Model not adjusted?	Discrimination: AUC ROC curve. Calibration: Hosmer Lemeshow C statistic
Nassar Jr, et al (2012)	SAPS 3	Validation of model performance	Prospective cohort	All consecutively patients (>18 years) admitted to 3 medical surgical ICUs, Brazil. Exclusion- acute coronary syndrome, readmission to ICU, transfer to another hospital. July 2008 to December 2011	Hospital mortality	Predictors and timings as per original study	5780	Exclusion and normal attribution- 3.02% patients with incomplete data which prevented an adequate calculation of one or more of the scores were excluded; these missing data could be pre-ICU length of stay, reason for ICU admission, chronic health variables and mechanical ventilation on first day. Missing physiologic variables, namely bilirubin, acid-base abnormalities, PaO2 or PaO2/FiO2 ratio, we…	Not Reported	External validation Model not adjusted?	Discrimination: AUC ROC curve. Calibration: Hosmer Lemeshow C statistic
Naved et al (2011)	APACHE II (TM 48 hours)	Validation of model performance after modification	Prospective cohort	All consecutive patients (>12 years) admitted to 10-bed general ICU, university hospital, Pakistan Exclusions -incomplete set of physiological variables, post - CABG patients, ICU stay < 24hours. 10th May 2005 to 10 May 2006	ICU mortality	Predictors as in original study. Score measured at 48 hours	253	Exclusion	Not Reported	External validation Model not adjusted?	Discrimination: not reported Calibration: not reported
Nimgaonkar et al (2004)	ANN 22 (MTM)	Validation of model performance after modification	Prospective cohort	All consecutive patients (>12 years) admitted to 17-bed medical-neurological ICU, tertiary referral hospital, India January 1996 to May 1998	Hospital mortality	Model trained on an Indian patient dataset using the 22 APACHE II variables	2962	Not reported	Not Reported	External validation Model not adjusted?	Discrimination: AUC ROC curve. Calibration: Hosmer Lemeshow
Nimgaonkar et al (2004)	ANN 15 (MTM)	Validation of model performance after modification	Prospective cohort	All consecutive patients (>12 years) admitted to 17-bed medical-neurological ICU, tertiary referral hospital, India January 1996 to May 1999	Hospital mortality	Model trained on an Indian patient dataset using the 15 variables with the highest information gain (measured by calculation of entropy)	2962	Not reported	Not Reported	External validation Model not adjusted?	Discrimination: AUC ROC curve. Calibration: Hosmer Lemeshow
Nimgaonkar et al (2004)	APACHE II	Validation of model performance	Prospective cohort	All consecutive patients (>12 years) admitted to 17-bed medical-neurological ICU, tertiary referral hospital, India January 1996 to May 2000	Hospital mortality	Predictors and timings as per original study.	2962	Not reported	Not Reported	External validation Model not adjusted?	Discrimination: AUC ROC curve. Calibration: Hosmer Lemeshow
Nouira et al (1998)	MPM I (24h)	Validation of model performance	Prospective cohort	All consecutive patients (> 16 years )admitted to two medical ICUs (8 beds each) and one surgical ICU (10 beds), two major teaching hospitals, Tunisia Exclusions - burn, coronary care, and cardiac surgery patients January 1994 for 18 months in medical ICUs and 6 months in surgical ICU	Hospital mortality		1325	Not reported	Not Reported	External validation Model not adjusted?	Discrimination: AUC ROC curve. Calibration: Hosmer Lemeshow C and H Classification measures - NPV, PPV
Nouira et al (1998)	APACHE II	Validation of model performance	Prospective cohort	All consecutive patients (> 16 years )admitted to two medical ICUs (8 beds each) and one surgical ICU (10 beds), two major teaching hospitals, Tunisia Exclusions - burn, coronary care, and cardiac surgery patients January 1994 for 18 months in medical ICUs and 6 months in surgical ICU	Hospital mortality	Predictors and timings as per original study	1325	Not reported	Not Reported	External validation Model not adjusted?	Discrimination: AUC ROC curve. Calibration: Hosmer Lemeshow C and H Classification measures - NPV, PPV
Nouira et al (1998)	MPM I (initial)	Validation of model performance	Prospective cohort	All consecutive patients (> 16 years )admitted to two medical ICUs (8 beds each) and one surgical ICU (10 beds), two major teaching hospitals, Tunisia Exclusions - burn, coronary care, and cardiac surgery patients January 1994 for 18 months in medical ICUs and 6 months in surgical ICU	Hospital mortality	Predictors and timings as per original study	1325	Not reported	Not Reported	External validation Model not adjusted?	Discrimination: AUC ROC curve. Calibration: Hosmer Lemeshow C and H Classification measures - NPV, PPV
Nouira et al (1998)	SAPS II	Validation of model performance	Prospective cohort	All consecutive patients (> 16 years )admitted to two medical ICUs (8 beds each) and one surgical ICU (10 beds), two major teaching hospitals, Tunisia Exclusions - burn, coronary care, and cardiac surgery patients January 1994 for 18 months in medical ICUs and 6 months in surgical ICU	Hospital mortality	Predictors and timings as per original study	1325	Not reported	Not Reported	External validation Model not adjusted?	Discrimination: AUC ROC curve. Calibration: Hosmer Lemeshow C and H Classification measures - NPV, PPV
Ratanarat et al (2005)	SAPS I	Validation of model performance	Retrospective cohort	All patients admitted to the 7-bed medical intensive care unit, university hospital, Thailand January 1999 and December 2000	ICU mortality	Predictors and timings as per original study	482	Not reported	Not Reported	External validation Model not adjusted?	not reported Calibration: not reported Classification measures - Sensitivity, specificity
Ratanarat et al (2005)	APACHE II	Validation of model performance	Retrospective cohort	All patients admitted to the 7-bed medical intensive care unit, university hospital, Thailand January 1999 and December 2001	ICU mortality	Predictors and timings as per original study	482	Not reported	Not Reported	External validation Model not adjusted?	not reported Calibration: not reported Classification measures - Sensitivity, specificity
Riviello et al (2016)	MPM III (initial)	Validation of model	Prospective	Consecutive patients (>15 years) admitted to 2 ICUs in different hospitals Exclusion criteria - Not specified August 2013 to October 2015	Hospital mortality	As original data collection within an hour of ICU admission	425 of 427 (due to absence of outcome data for 2)	Normal values for attributed as in original study.	Not Reported	External validation Model not adjusted	Discrimination: AUC ROC curve. Calibration: Hosmer Lemeshow
Sathe and Bapat (2014)	SAPS II	Validation of model performance	Prospective, observational cohort	All consecutive admissions (>18 years) to 28-bedded multidisciplinary ICU, tertiary hospital, India Exclusions -ICU stay <24 hours, discharge against medical advice, readmission to ICU January 2011 to December 2011	Hospital mortality	Predictors and timings as per original study	1543	Not reported	Not Reported	External validation Model not adjusted?	Discrimination: AUC ROC curve. Calibration: Hosmer Lemeshow
Sathe and Bapat (2014)	APACHE II	Validation of model performance	Prospective cohort	All consecutive admissions (>18 years) to 28-bedded multidisciplinary ICU, tertiary hospital, India Exclusions -ICU stay <24 hours, discharge against medical advice, readmission to ICU January 2011 to December 2012	Hospital mortality	Predictors and timings as per original study	1543	Not reported	Not Reported	External validation Model not adjusted?	Discrimination: AUC ROC curve. Calibration: Hosmer Lemeshow
Sekulic et al (2015)	MPM II (initial)	Validation of model	Prospective	60 randomly selected patients (>18 years) admitted to a surgical ICU.	ICU mortality	As original	60	Not reported	Not Reported	External validation Model not adjusted	Discrimination: AUC ROC curve. Calibration: Hosmer Lemeshow Classification measures - sensitivity, specificity
Sekulic et al (2015)	MPM II (24 hours)	Validation of model	Prospective	61 randomly selected patients (>18 years) admitted to a surgical ICU.	ICU mortality	As original	61	Not reported	Not Reported	External validation Model not adjusted	Discrimination: AUC ROC curve. Calibration: Hosmer Lemeshow Classification measures - sensitivity, specificity
Sekulic et al (2015)	MPM II (48 hours)	Validation of model	Prospective	62 randomly selected patients (>18 years) admitted to a surgical ICU.	ICU mortality	As original	62	Not reported	Not Reported	External validation Model not adjusted	Discrimination: AUC ROC curve. Calibration: Hosmer Lemeshow Classification measures - sensitivity, specificity
Sekulic et al (2015)	MPM II (72 hours)	Validation of model	Prospective	63 randomly selected patients (>18 years) admitted to a surgical ICU.	ICU mortality	As original	63	Not reported	Not Reported	External validation Model not adjusted	Discrimination: AUC ROC curve. Calibration: Hosmer Lemeshow Classification measures - sensitivity, specificity
Sekulic et al (2015)	MPM II (7days)	Validation of model	Prospective	64 randomly selected patients (>18 years) admitted to a surgical ICU.	ICU mortality	As original	64	Not reported	Not Reported	External validation Model not adjusted	Discrimination: AUC ROC curve. Calibration: Hosmer Lemeshow Classification measures - sensitivity, specificity
Sekulic et al (2015)	SAPS II	Validation of model	Prospective	69 randomly selected patients (>18 years) admitted to a surgical ICU.	ICU mortality	As original	69	Not reported	Not Reported	External validation Model not adjusted	Discrimination: AUC ROC curve. Calibration: Hosmer Lemeshow Classification measures - sensitivity, specificity
Sekulic et al (2015)	APACHE II	Validation of model	Prospective	70 randomly selected patients (>18 years) admitted to a surgical ICU.	ICU mortality	As original	70	Not reported	Not Reported	External validation Model not adjusted	Discrimination: AUC ROC curve. Calibration: Hosmer Lemeshow Classification measures - sensitivity, specificity
Shoukat et al (2016)	APACHE IV	Validation of model	Prospective	Patients (>12 years) admitted to the Surgical ICU June 2013 to November 2014	Mortality (not specified - most likely ICU)	Data recorded during first 24 hours of ICU stay.	155	Not reported	Not Reported	External validation Model not adjusted	Discrimination: not reported Calibration: not reported
Shrestha et al (2012)	APACHE III	Validation of model performance	Prospective cohort	Consecutive patients (>16 years) admitted to 6-bed multidisciplinary ICU, university hospital, Nepal. Exclusion - ICU stay <24 hours, discharge against medical advice. September 2009 to March 2011	ICU mortality	Predictors and timings as per original study	117	Not reported	Not Reported	External validation Model not adjusted?	Discrimination: AUC ROC curve. Calibration: Hosmer Lemeshow Classification measures - sensitivity, specificity, NPV, PPV, accuracy
Silva Junior et al (2010)	SAPS 3	Validation of model performance	Prospective cohort	Consecutive patients (>16 years) admitted to the intensive care units in two intensive care units of two different tertiary hospitals, Brazil Exclusion -admitted only for haemodialysis, ICU stay <24 hours, readmissions. March 2008 to March 2009	Hospital mortality	Predictors and timings as per original study	1310	Not reported	Not Reported	External validation Model not adjusted?	Discrimination: AUC ROC curve. Calibration: Hosmer Lemeshow C statistic Classification measures - sensitivity, specificity
Soares and Salluh (2006)	SAPS 3 (CSA)	Validation of model performance	Prospective cohort	All consecutive patients (>18 years) with cancer admitted to the ICU was evaluated10-bed medical–surgical oncologic unit, cancer hospital, Brazil Exclusions - ICU stay< 12 h, with noncancer diseases and considered cured from their cancer for over 5 years, bone marrow transplant (BMT) patients January 2003 to December 2005	Hospital mortality	Predictors and timings as per original study	952	Normal values substituted -Zero points or normal values were assigned for missing variables [1, 12]. There were no missing data for demographic, clinical and physiologic data. Among laboratory variables, normal values were attributed only for bilirubin in 535 patients (56%). No patient with jaundice lacked bilirubin level measurements.	Not Reported	External validation Model not adjusted?	Discrimination: AUC ROC curve. Calibration: Hosmer Lemeshow C statistic
Soares and Salluh (2006)	SAPS 3	Validation of model performance	Prospective cohort	All consecutive patients (>18 years) with cancer admitted to the ICU was evaluated10-bed medical–surgical oncologic unit, cancer hospital, Brazil Exclusions - ICU stay< 12 h, with noncancer diseases and considered cured from their cancer for over 5 years, bone marrow transplant (BMT) patients January 2003 to December 2005	Hospital mortality	Predictors and timings as per original study	952	Normal values substituted -Zero points or normal values were assigned for missing variables [1, 12]. There were no missing data for demographic, clinical and physiologic data. Among laboratory variables, normal values were attributed only for bilirubin- bin in 535 patients (56%). No patient with jaundice lacked bilirubin level measurements.	Not Reported	External validation Model not adjusted?	Discrimination: AUC ROC curve. Calibration: Hosmer Lemeshow C statistic
Soares and Salluh (2006)	SAPS II	Validation of model performance	Prospective cohort	All consecutive patients (>18 years) with cancer admitted to the ICU was evaluated10-bed medical–surgical oncologic unit, cancer hospital, Brazil Exclusions - ICU stay< 12 h, with noncancer diseases and considered cured from their cancer for > 5 years, bone marrow transplant (BMT) patients, readmissions to ICU January 2003 to December 2005	Hospital mortality	Predictors and timings as per original study	952	Normal values substituted -Zero points or normal values were assigned for missing variables [1, 12]. There were no missing data for demographic, clinical and physiologic data. Among laboratory variables, normal values were attributed only for bilirubin in 535 patients (56%). No patient with jaundice lacked bilirubin level measurements.	Not Reported	External validation Model not adjusted?	Discrimination: AUC ROC curve. Calibration: Hosmer Lemeshow C statistic
Soares et al (2004)	SAPS II	Validation of model performance	Prospective, observational cohort	All consecutive patients (>18 years) with a definite diagnosis of cancer (pathologically proven) admitted due to severe illness to the 10-bed medical/surgical unit exclusively for oncological patients , tertiary hospital, Brazil Exclusions - burn injuries, ICU stay < 6 hours, definite diagnosis of acute coronary syndrome or when such a disorder could not be ruled out were excluded, considered cur…	Hospital mortality	Predictors and timings as per original study	1257	Normal values substituted-Zero points or normal values were inserted where data were missing. There were no missing variables for physiological data. Among laboratory variables, normal values were inserted for albumin in 623 (49.6%), prothrombin time in 274 (21.8%) and bilirubin in 676 (53.8%) patients. No patient with jaundice on physical examination lacked serum bilirubin measurements	Not Reported	External validation Model not adjusted?	Discrimination: AUC ROC curve. Calibration: Hosmer Lemeshow H statistic
Soares et al (2004)	APACHE II	Validation of model performance	Prospective, observational cohort	All consecutive patients (>18 years) with a definite diagnosis of cancer (pathologically proven) admitted due to severe illness to the 10-bed medical/surgical unit exclusively for oncological patients , tertiary hospital, Brazil Exclusions - burn injuries, ICU stay < 6 hours, definite diagnosis of acute coronary syndrome or when such a disorder could not be ruled out were excluded, considered cur…	Hospital mortality		1257	Normal values substituted-Zero points or normal values were inserted where data were missing. There were no missing variables for physiological data. Among laboratory variables, normal values were inserted for albumin in 623 (49.6%), prothrombin time in 274 (21.8%) and bilirubin in 676 (53.8%) patients. No patient with jaundice on physical examination lacked serum bilirubin measurements	Not Reported	External validation Model not adjusted?	Discrimination: AUC ROC curve. Calibration: Hosmer Lemeshow H statistic
Soares et al (2004)	MPM II (24h)	Validation of model performance	Prospective, observational cohort	All consecutive patients (>18 years) with a definite diagnosis of cancer (pathologically proven) admitted due to severe illness to the 10-bed medical/surgical unit exclusively for oncological patients , tertiary hospital, Brazil Exclusions - burn injuries, ICU stay < 6 hours, definite diagnosis of acute coronary syndrome or when such a disorder could not be ruled out were excluded, considered cur…	Hospital mortality	Predictors and timings as per original study	1257		Not Reported	External validation Model not adjusted?	Discrimination: AUC ROC curve. Calibration: Hosmer Lemeshow H statistic
Soares et al (2004)	APACHE III	Validation of model performance	Prospective, observational cohort	All consecutive patients (>18 years) with a definite diagnosis of cancer (pathologically proven) admitted due to severe illness to the 10-bed medical/surgical unit exclusively for oncological patients , tertiary hospital, Brazil Exclusions - burn injuries, ICU stay < 6 hours, definite diagnosis of acute coronary syndrome or when such a disorder could not be ruled out were excluded, considered cur…	Hospital mortality	Predictors and timings as per original study	1257	Normal values substituted-Zero points or normal values were inserted where data were missing. There were no missing variables for physiological data. Among laboratory variables, normal values were inserted for albumin in 623 (49.6%), prothrombin time in 274 (21.8%) and bilirubin in 676 (53.8%) patients. No patient with jaundice on physical examination lacked serum bilirubin measurements	Not Reported	External validation Model not adjusted?	Discrimination: AUC ROC curve. Calibration: Hosmer Lemeshow H statistic
Soares et al (2004)	MPM II (initial)	Validation of model performance	Prospective, observational cohort	All consecutive patients (>18 years) with a definite diagnosis of cancer (pathologically proven) admitted due to severe illness to the 10-bed medical/surgical unit exclusively for oncological patients , tertiary hospital, Brazil Exclusions - burn injuries, ICU stay < 6 hours, definite diagnosis of acute coronary syndrome or when such a disorder could not be ruled out were excluded, considered cur…	Hospital mortality	Predictors and timings as per original study	1257	Normal values substituted-Zero points or normal values were inserted where data were missing. There were no missing variables for physiological data. Among laboratory variables, normal values were inserted for albumin in 623 (49.6%), prothrombin time in 274 (21.8%) and bilirubin in 676 (53.8%) patients. No patient with jaundice on physical examination lacked serum bilirubin measurements	Not Reported	External validation Model not adjusted?	Discrimination: AUC ROC curve. Calibration: Hosmer Lemeshow H statistic
Soares et al (2010)	SAPS 3 (CSA)	Validation of model performance	Prospective cohort	All patients with cancer (>18 years) admitted to 28 ICUs, multiple hospitals, Brazil. Exclusions - remission for > 5 years, ICU stay <24 h, readmission to ICU. August 2007 and 30 September 2007	Hospital mortality	Predictors and timings as per original study	717	Normal values substituted - Zero points or normal values were attributed for missing variables. There were no missing data for demographic, clinical and physiologic data. Missing laboratory variables are depicted in Table 1 of Electronic Supplementary Material (ESM). No patient with jaundice lacked bilirubin levels measurements	Not Reported	External validation Model not adjusted?	Discrimination: AUC ROC curve. Calibration: Hosmer Lemeshow C statistic
Soares et al (2010)	MPM III (24hours)	Validation of model performance	Prospective cohort	All patients with cancer (>18 years) admitted to 28 ICUs, multiple hospitals, Brazil. Exclusions - remission for > 5 years, ICU stay <24 h, readmission to ICU. August 2007 and 30 September 2008	Hospital mortality	Predictors and timings as per original study	717	Normal values substituted - Zero points or normal values were attributed for missing variables. There were no missing data for demographic, clinical and physiologic data. Missing laboratory variables are depicted in Table 1 of Electronic Supplementary Material (ESM). No patient with jaundice lacked bilirubin levels measurements	Not Reported	External validation Model not adjusted?	Discrimination: AUC ROC curve. Calibration: Hosmer Lemeshow C statistic
Soares et al (2010)	SAPS 3	Validation of model performance	Prospective cohort	All patients with cancer (>18 years) admitted to 28 ICUs, multiple hospitals, Brazil. Exclusions - remission for > 5 years, ICU stay <24 h, readmission to ICU. August 2007 and 30 September 2009	Hospital mortality	Predictors and timings as per original study	717	Normal values substituted - Zero points or normal values were attributed for missing variables. There were no missing data for demographic, clinical and physiologic data. Missing laboratory variables are depicted in Table 1 of Electronic Supplementary Material (ESM). No patient with jaundice lacked bilirubin levels measurements	Not Reported	External validation Model not adjusted?	Discrimination: AUC ROC curve. Calibration: Hosmer Lemeshow C statistic
Soares et al (2010)	SAPS II	Validation of model performance	Prospective cohort	All patients with cancer (>18 years) admitted to 28 ICUs, multiple hospitals, Brazil. Exclusions - remission for > 5 years, ICU stay <24 h, readmission to ICU. August 2007 and 30 September 2010	Hospital mortality	Predictors and timings as per original study	717	Normal values substituted - Zero points or normal values were attributed for missing variables. There were no missing data for demographic, clinical and physiologic data. Missing laboratory variables are depicted in Table 1 of Electronic Supplementary Material (ESM). No patient with jaundice lacked bilirubin levels measurements	Not Reported	External validation Model not adjusted?	Discrimination: AUC ROC curve. Calibration: Hosmer Lemeshow C statistic
Sutheechet (2009)	MPM II (24h)	Validation of model performance	Prospective cohort	All consecutive admitted patients, (>18 years )to a surgical ICU and mixed medical and coronary care unit (8-beds each), tertiary care university hospital, Thailand. Exclusion - burn patients, acute coronary care and cardiac surgery patients, missing data ,ICU stay < 24 hours, readmissions to ICU May 2008 to March, 2009	Hospital mortality	Predictors and timings as per original study	639	Not reported	Not Reported	External validation Model not adjusted?	Discrimination: AUC ROC curve. Calibration: Hosmer Lemeshow Classification measures - sensitivity, specificity, accuracy, NPV, PPV
Sutheechet (2009)	SAPS II	Validation of model performance	Prospective cohort	All consecutive admitted patients, (>18 years )to a surgical ICU and mixed medical and coronary care unit (8-beds each), tertiary care university hospital, Thailand. Exclusion - burn patients, acute coronary care and cardiac surgery patients, missing data ,ICU stay < 24 hours, readmissions to ICU May 2008 to March, 2009	Hospital mortality	Predictors and timings as per original study	639	Not reported	Not Reported	External validation Model not adjusted?	Discrimination: AUC ROC curve. Calibration: Hosmer Lemeshow Classification measures - sensitivity, specificity, accuracy, NPV, PPV
Teoh et al (1997)	APACHE II	To assess the direct relationship between APACHE II score and mortality	Prospective cohort	First l00 consecutive admissions from operating theatre, recovery room and all wards to the ICU, university hospital, Malaysia. Exclusions - pain relief only, cardiac surgery August 1990 to September 1990	Hospital mortality	Predictors and timings as per original study	100	Not reported	Not Reported	External validation Model not adjusted?	Discrimination: not reported Calibration: not reported
Turner et al (1989)	APACHE II	Validation of model performance	Prospective cohort	All patients admitted from all departments to the Respiratory Intensive Care Unit (RICU), teaching hospital, South Africa Exclusion - primary cardiac disease (usually admitted to a specialised coronary care unit) 1985 and 1986	ICU mortality	Predictors and timings as per original study	728	Not reported	Not Reported	External validation Model not adjusted?	Discrimination: not reported Calibration: not reported
Wilairatana et al (1995)	APACHE III	Validation of model performance	Prospective cohort	All critically ill patients (>15 years) admitted to the medical-surgical ICU, referral teaching hospital, Thailand Exclusions - missing data, death within 24 hours of admission November 1993 to January 1994	Hospital mortality	Predictors and timings as per original study	209	Exclusion- When scores could not be derived due to an incomplete set of physiological data patients were excluded (numbers not reported).	Not Reported	External validation Model not adjusted?	Discrimination: AUC ROC curve. Calibration: Not reported Classification measures - sensitivity, specificity, accuracy
Wilairatana et al (1995)	SAPS II	Validation of model performance	Prospective cohort	All critically ill patients (>15 years) admitted to the medical-surgical ICU, referral teaching hospital, Thailand Exclusions - missing data, death within 24 hours of admission November 1993 to January 1996	Hospital mortality	Predictors and timings as per original study	209	Exclusion- When scores could not be derived due to an incomplete set of physiological data patients were excluded (numbers not reported).	Not Reported	External validation Model not adjusted?	Discrimination: AUC ROC curve. Calibration: Not reported Classification measures - sensitivity, specificity, accuracy
Wilairatana et al (1995)	APACHE II	Validation of model performance	Prospective cohort	All critically ill patients (>15 years) admitted to the medical-surgical ICU, referral teaching hospital, Thailand Exclusions - missing data, death within 24 hours of admission November 1993 to January 1997	Hospital mortality	Predictors and timings as per original study	209	Exclusion- When scores could not be derived due to an incomplete set of physiological data patients were excluded (numbers not reported).	Not Reported	External validation Model not adjusted?	Discrimination: AUC ROC curve. Calibration: Not reported Classification measures - sensitivity, specificity, accuracy
XueZhong et al (2015)	APACHE II	Validation of model	Retrospective	Patients (>18 years) admitted to the ICU Exclusion - Patients with LOS <24 hours, readmission during same hospital stay October 2008 and September 2010	Hospital mortality	As original SAPS 3 collected and recorded within an hour of ICU admission and APACHE II and IV within 24 hours of admission	981	Not reported	Not Reported	External validation Model not adjusted	Discrimination: AUC ROC curve. Calibration: Hosmer Lemeshow C-statistic SMR
XueZhong et al (2015)	APACHE IV	Validation of model	Retrospective	Patients (>18 years) admitted to the ICU Exclusion - Patients with LOS <24 hours, readmission during same hospital stay October 2008 and September 2011	Hospital mortality	As original SAPS 3 collected and recorded within an hour of ICU admission and APACHE II and IV within 24 hours of admission	982	Not reported	Not Reported	External validation Model not adjusted	Discrimination: AUC ROC curve. Calibration: Hosmer Lemeshow C-statistic SMR
Xing et al (2015)	SAPS 3	Validation of model	Retrospective	Patients (>18 years) admitted to the ICU Exclusion - Patients with LOS <24 hours, readmission during same hospital stay October 2008 and September 2012	Hospital mortality	As original SAPS 3 collected and recorded within an hour of ICU admission and APACHE II and IV within 24 hours of admission	983	Not reported	Not Reported	External validation Model not adjusted	Discrimination: AUC ROC curve. Calibration: Hosmer Lemeshow C-statistic SMR
Yamin et al (2011)	APACHE IV	Validation of model performance	Prospective, observational cohort	Random selection of Patients of Surgical ICU, Medical ICU and neurocoma ICU, Pakistan Exclusion - ICU stay ICU <24 hours, CABG January 2009 to September 2009.	ICU mortality	Predictors and timings as per original study	162	Not specified	Not Reported	External validation Model not adjusted?	Discrimination: not reported Calibration: not reported
Zhao et al (2013)	SAPS II (initial)	Validation of model performance	Prospective cohort	Patients consecutively admitted (>18 years) to the Neurology-ICU, Exclusion - ICU stay <24hours January 2005 and December 2011.	ICU mortality	As original study Worst values at admission	1684	Not reported	Not Reported	External validation Model not adjusted?	Discrimination: AUC ROC curve. Calibration: Hosmer Lemeshow Classification measures - sensitivity, specificity, accuracy
Zhao et al (2013)	SAPS II (TM 48 hours)	Validation of model performance after modification	Prospective cohort	Patients consecutively admitted (>18 years) to the Neurology-ICU, Exclusion - ICU stay <24hours January 2005 and December 2011.	ICU mortality	As original study Worst values at 48 hours	1684	Not reported	Not Reported	External validation Model not adjusted?	Discrimination: AUC ROC curve. Calibration: Hosmer Lemeshow Classification measures - sensitivity, specificity, accuracy
Zhao et al (2013)	SAPS II (24h)	Validation of model performance	Prospective cohort	Patients consecutively admitted (>18 years) to the Neurology-ICU, Exclusion - ICU stay <24hours January 2005 and December 2011.	ICU mortality	As original study Worst values at 24 hours	1684	Not reported	Not Reported	External validation Model not adjusted?	Discrimination: AUC ROC curve. Calibration: Hosmer Lemeshow Classification measures - sensitivity, specificity, accuracy
Zhao et al (2013)	SAPS II (TM 72 hours)	Validation of model performance after modification	Prospective cohort	Patients consecutively admitted (>18 years) to the Neurology-ICU, Exclusion - ICU stay <24hours January 2005 and December 2011.	ICU mortality	As original study Worst values at 72 hours	1684	Not reported	Not Reported	External validation Model not adjusted?	Discrimination: AUC ROC curve. Calibration: Hosmer Lemeshow Classification measures - sensitivity, specificity, accuracy
Zhao et al (2013)	Simplified SAPS II (VM)	Validation of model performance after modification	Prospective cohort	Patients consecutively admitted (>18 years) to the Neurology-ICU, Exclusion - ICU stay <24hours January 2005 and December 2011.	ICU mortality	Underlying disease variables and admission type variable excluded from original study variables. Worst values at admission, at 24h, 48h, and 72hhour	1684	Not reported	Not Reported	External validation Model not adjusted?	Discrimination: not reported. Calibration: not reported
